# Supplementary material for: Prognostic nomogram for patients with unresectable pancreatic cancer treated with gemcitabine plus nab–paclitaxel or FOLFIRINOX: A post–hoc analysis of a multicenter retrospective study in Japan (NAPOLEON study)
Source: PubMed Central journal article supplement (PMC8722136; doi:10.1186/s12885-021-09139-y), 2022-01-03

6 months

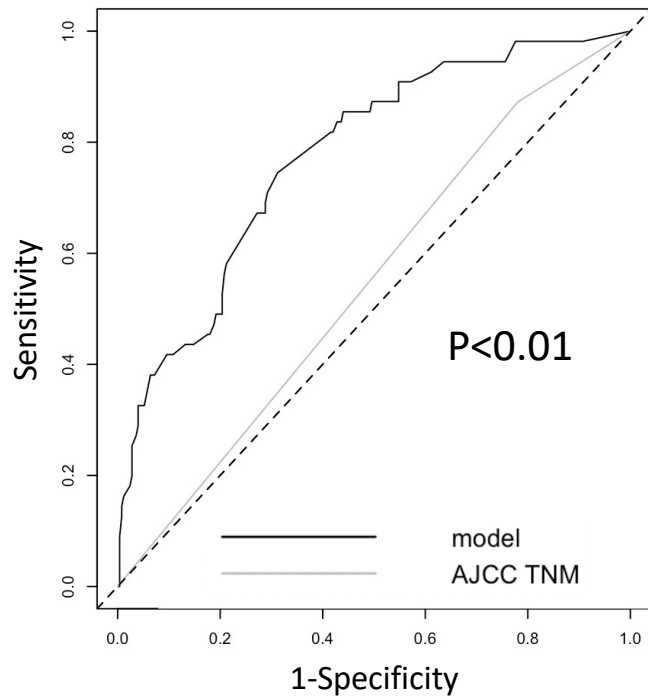

12 months

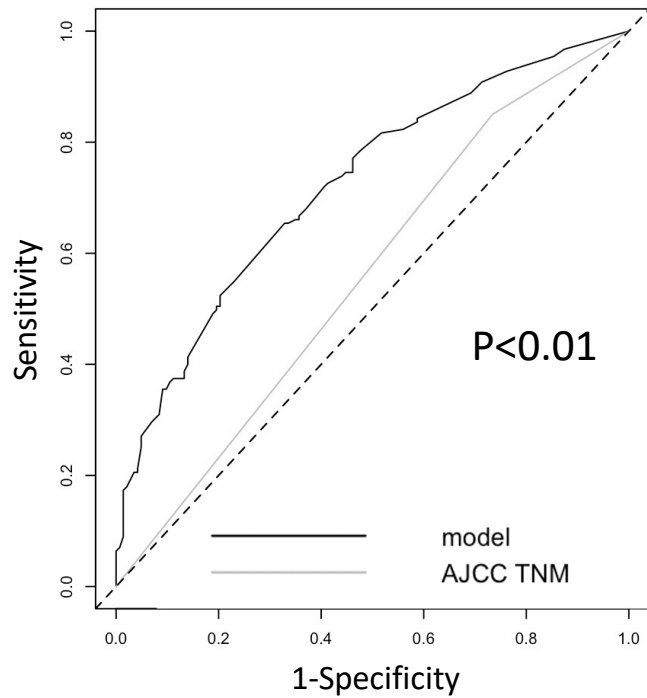

18 months

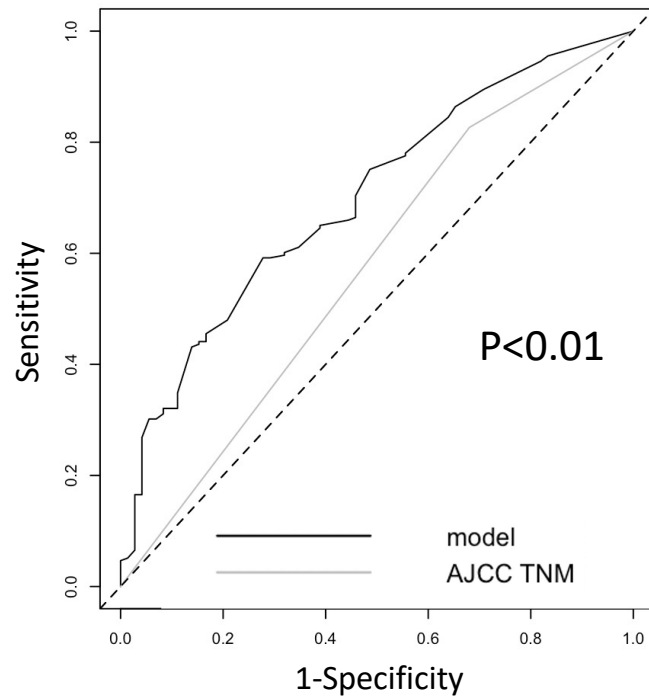

Supplement: 12885_2021_9139_MOESM1_ESM.pdf [file 12885_2021_9139_MOESM1_ESM.pdf]
