# Supplementary material for: Prognostic nomogram for patients with unresectable pancreatic cancer treated with gemcitabine plus nab–paclitaxel or FOLFIRINOX: A post–hoc analysis of a multicenter retrospective study in Japan (NAPOLEON study)
Source: PubMed Central journal article supplement (PMC8722136; doi:10.1186/s12885-021-09139-y), 2022-01-03

**6-month survival**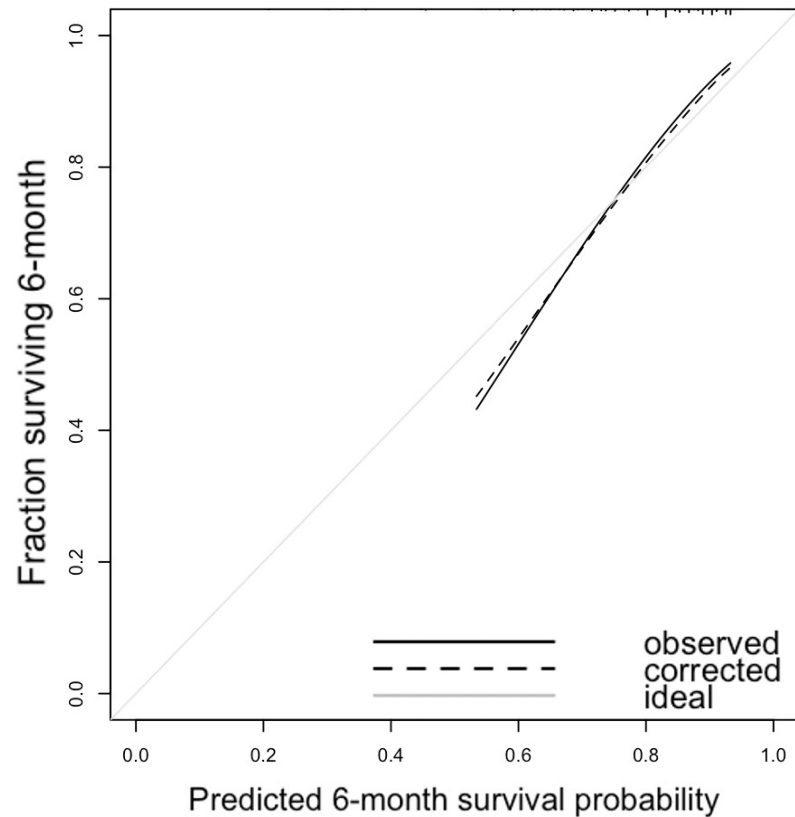**12-month survival**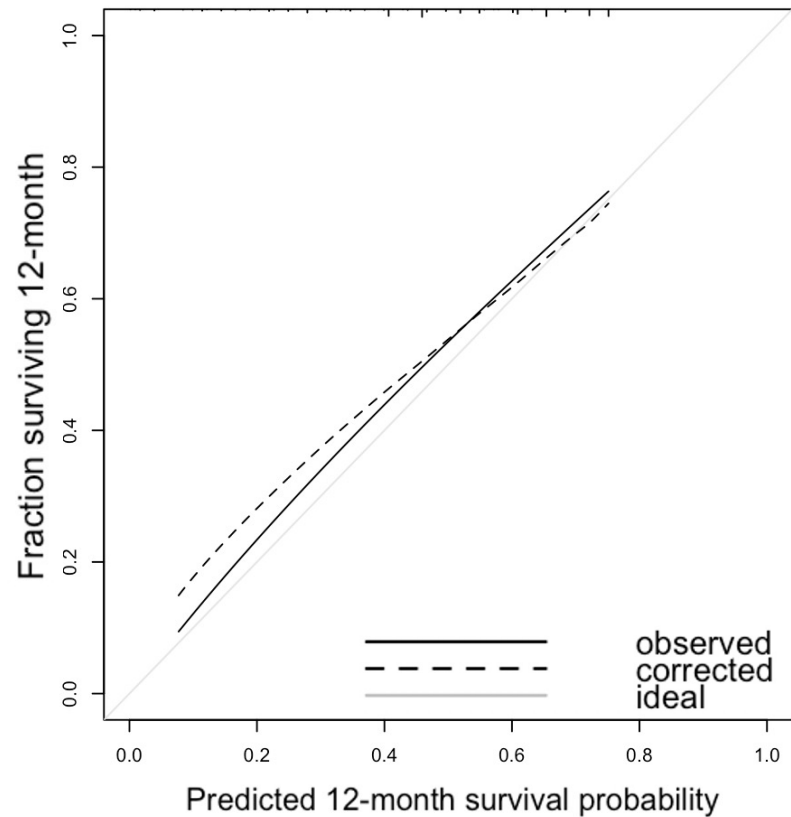**18-month survival**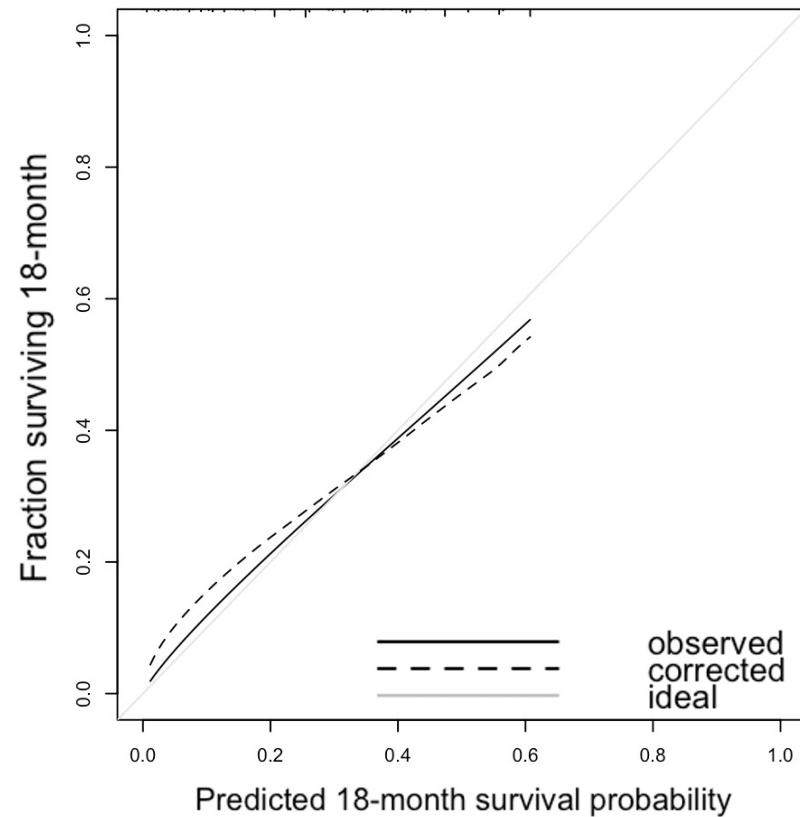

Supplement: 12885_2021_9139_MOESM2_ESM.pdf [file 12885_2021_9139_MOESM2_ESM.pdf]
